# Supplementary material for: Patient Preferences for Change in Symptoms Associated with Opioid-Induced Constipation
Source: PubMed Central journal article supplement — Adv Ther. 2014 Nov 21;31(12):1263–71. doi: 10.1007/s12325-014-0169-x (PMC4271128; doi:10.1007/s12325-014-0169-x), 2014-11-21
Supplement: 12325_2014_169_MOESM1_ESM.pdf [file 12325_2014_169_MOESM1_ESM.pdf]

- The purpose of our study was to determine the symptoms patients with opioid induced constipation would prefer to improve the most and the magnitude of change desired.
- An on-line survey of 513 patients across six countries was conducted.
- At least 80% of the participants responded that they would prefer to have bowel movements without pain, soft stools that are not loose or watery, a reduction in rectal straining, relief from feeling bloated, use opioid medications with less fear of constipation, worry less about having bowel movements, and have less pain in the stomach area.
- More than 90% of participants felt that having at least one more bowel movement per week would be an important change in their symptomatology.
- Future research should focus on these patient-centered preferences.

This summary slide represents the opinions of the authors. Sponsorship for this study was funded by AstraZeneca. For a full list of acknowledgments and conflicts of interest for all authors of this article, please see the full text online. Copyright © The Authors 2014. Creative Commons Attribution Noncommercial License (CC BY-NC).
